# Supplementary material for: Status of Diabetic Neuropathy in Korea: A National Health Insurance Service-National Sample Cohort Analysis (2006 to 2015)
Source: PubMed Central journal article supplement — Diabetes Metab J. 2020 Dec 18;45(1):115–9. doi: 10.4093/dmj.2020.0120 (PMC7850872; doi:10.4093/dmj.2020.0120), 2020-12-18
Supplement: dmj-2020-0120-suppl1.pdf [file dmj-2020-0120-suppl1.pdf]

**Supplementary Table 1.** Anatomical therapeutic chemical code for drugs of diabetic neuropathy

| ATC codes | Drug                 |
|-----------|----------------------|
| A16AX01   | Thioctic acid        |
| D11AX02   | Gamma-linolenic acid |
| N06AA09   | Amitriptyline        |
| N06AA10   | Nortriptyline        |
| N03AX12   | Gabapentin           |
| N03AX16   | Pregabalin           |
| N06AX21   | Duloxetine           |
