# Supplementary material for: Status of Diabetic Neuropathy in Korea: A National Health Insurance Service-National Sample Cohort Analysis (2006 to 2015)
Source: PubMed Central journal article supplement — Diabetes Metab J. 2020 Dec 18;45(1):115–9. doi: 10.4093/dmj.2020.0120 (PMC7850872; doi:10.4093/dmj.2020.0120), 2020-12-18
Supplement: dmj-2020-0120-suppl3.pdf [file dmj-2020-0120-suppl3.pdf]

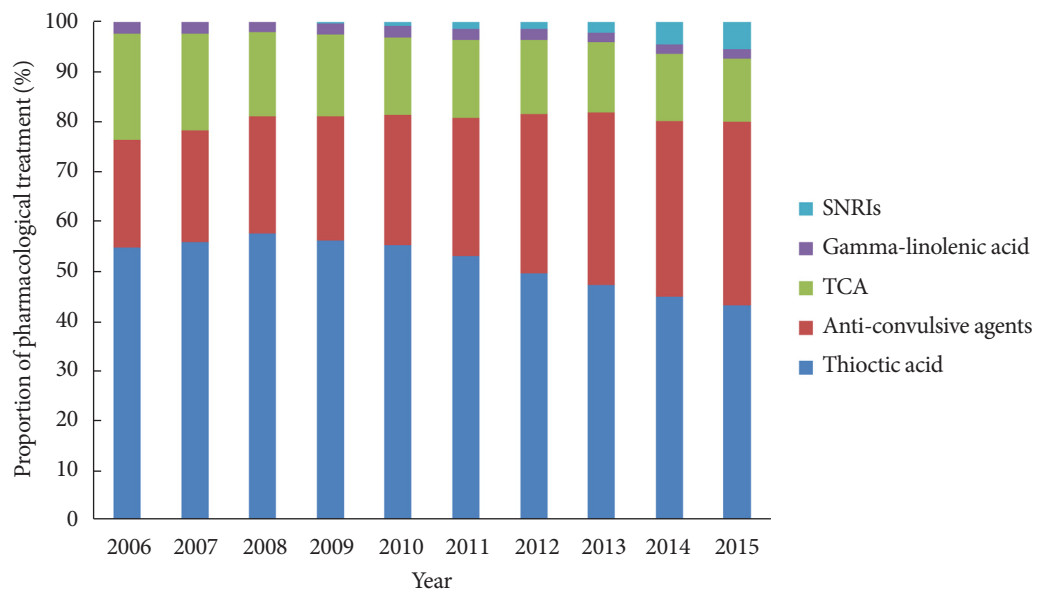

**Supplementary Fig. 2.** Trends of monotherapy drugs for diabetic neuropathy. SNRI, serotonin-norepinephrine reuptake inhibitor; TCA, tricyclic antidepressant.
